# Supplementary material for: Umbilical Cord-Derived Mesenchymal Stem Cells Attenuate S100-Induced Autoimmune Hepatitis via Modulating Th1 and Th17 Cell Responses in Mice
Source: Hindawi journal article supplement (doi:10.1155/2023/9992207), 2023-10-17
Supplement: f2 [file 9992207.f2.pdf]

## Approval by Ethics Committee of LZU No. 1 Hospital

|                                                                                                                                                                                           |                                          |                             |
|-------------------------------------------------------------------------------------------------------------------------------------------------------------------------------------------|------------------------------------------|-----------------------------|
| Approval No. :LDYYLL-2022-421                                                                                                                                                             | Date of review:30/09/2022                |                             |
| Name of research plan: Umbilical Cord derived Mesenchymal Stem Cells ameliorate Experimental Autoimmune Hepatitis by inhibiting CD4+ T cell Migration and Th17 Differentiation            |                                          |                             |
| Applicant/trial product/SFDA No. :<br>The No. 1 Hospital of Lanzhou University                                                                                                            | Type                                     | Scientific research         |
| Principal Investigator/organization: Xiaofeng Wei / The No. 1 Hospital of Lanzhou University                                                                                              |                                          |                             |
| Document (with version number)                                                                                                                                                            |                                          |                             |
| Research plan                                                                                                                                                                             | <input checked="" type="checkbox"/> Have | <input type="checkbox"/> No |
| Waiver of Informed consent form                                                                                                                                                           | <input checked="" type="checkbox"/> Have | <input type="checkbox"/> No |
| Application for ethical review of animal experiments                                                                                                                                      | <input checked="" type="checkbox"/> Have | <input type="checkbox"/> No |
| Results of Ethics Committee' s review:                                                                                                                                                    |                                          |                             |
| 1. The Committee reviewed the technical plan and informed consent form for the participants, decisions for the program are as follows :                                                   |                                          |                             |
| <input checked="" type="checkbox"/> Approve                                                                                                                                               |                                          |                             |
| <input type="checkbox"/> Approve after amendment                                                                                                                                          |                                          |                             |
| <input type="checkbox"/> Disapprove                                                                                                                                                       |                                          |                             |
| <input type="checkbox"/> Termination or suspension                                                                                                                                        |                                          |                             |
| 2. Will the progress of the research reviewed by the ethics committee continually?                                                                                                        |                                          |                             |
| <input checked="" type="checkbox"/> Yes <input type="checkbox"/> No                                                                                                                       |                                          |                             |
| 3. The frequency of review is once every <u>12 months</u> from the date of approval, the ethics committee has right to change the frequency of continued review based on actual progress. |                                          |                             |
| LZU No. 1 hospital Ethics Committee (Seal):                                                          |                                          |                             |
| Date: 30/09/2022                                                                                                                                                                          |                                          |                             |
